# Supplementary material
Source: publisher figshare collection journal article supplement (https://tandf.figshare.com/articles/dataset/_/8396918)

## Online Appendix

**Table A1. Descriptive Statistics**

|                      |                                    | Country     |                 |
|----------------------|------------------------------------|-------------|-----------------|
|                      |                                    | Germany     | The Netherlands |
| Emotion              | Enthusiasm (1-4)                   | 1.63 (0.69) | 1.55 (0.67)     |
|                      | Anxiety (1-4)                      | 2.58 (0.97) | 2.53 (0.86)     |
|                      | Anger (1-4)                        | 2.04 (1.07) | 2.20 (1.04)     |
| Hostility            | Combined Scale: 1-5                | 3.07 (0.92) | 3.14 (0.87)     |
| Trust and Pride      | Trust in National Government (0-1) | 0.47 (0.49) | 0.50 (0.50)     |
|                      | Trust in EU (0-1)                  | 0.25 (0.43) | 0.36 (0.48)     |
|                      | EU Pride (1-4)                     | 2.68 (0.87) | 2.51 (0.78)     |
| Gender               | Male                               | 51.6%       | 52.6%           |
|                      |                                    | [49.3%]     | [49.6%]         |
|                      | Female                             | 48.4%       | 47.3%           |
|                      |                                    | [50.7%]     | [50.4%]         |
| Education            | Years of Schooling                 | 6.32 (5.42) | 14.9 (4.07)     |
| Age                  | In years                           | 53.2 (13.8) | 46.6 (15.6)     |
|                      |                                    | [45.9%]     | [42.8%]         |
| Liberal-Conservative | Scale: 1-10                        | 5.04 (1.91) | 5.33 (1.56)     |
| Left-Right           | Scale: 1-10                        | 5.11 (1.74) | 5.74 (1.87)     |

**Note.** Except for gender, averages (with standard deviations in parentheses) are reported. Values in brackets report census values for the respective country.

**Table A2. Coding (and number of observations) for the Combined Common Immigration and Common Terrorism Policies**

|                                  |                          | <b>Common Terrorism Policy</b> |                     |                          |
|----------------------------------|--------------------------|--------------------------------|---------------------|--------------------------|
|                                  |                          | Strongly Oppose/Oppose         | Neutral             | Strongly Support/Support |
| <b>Common Immigration Policy</b> | Strongly Oppose/Oppose   | Coded as 0<br>(n=52)           | Excluded<br>(n=38)  | Coded as 1<br>(n=206)    |
|                                  | Neutral                  | Excluded<br>(n=3)              | Excluded<br>(n=104) | Excluded<br>(n=251)      |
|                                  | Strongly Support/Support | Excluded<br>(n=7)              | Excluded<br>(n=24)  | Coded as 0<br>(n=668)    |

**Table A3. Combined Common EU Policy Models Separated on the Basis of Response Groups**

|                               | Oppose Both Policies |                     | Oppose Immigration Policy, but<br>Support Terrorism Policy |                       | Support Both Policies |                      |
|-------------------------------|----------------------|---------------------|------------------------------------------------------------|-----------------------|-----------------------|----------------------|
| Enthusiasm                    | 0.356<br>(0.235)     | 0.615*<br>(0.252)   | -0.748***<br>(0.186)                                       | -0.524**<br>(0.201)   | 0.405**<br>(0.155)    | 0.116<br>(0.178)     |
| Anger                         | 0.761***<br>(0.211)  | 0.471+<br>(0.278)   | 0.337**<br>(0.120)                                         | 0.0856<br>(0.134)     | -0.528***<br>(0.112)  | -0.222+<br>(0.127)   |
| Anxiety                       | -0.304<br>(0.270)    | -0.542+<br>(0.305)  | 0.485**<br>(0.153)                                         | 0.294+<br>(0.156)     | -0.320*<br>(0.144)    | -0.0796<br>(0.150)   |
| Germany                       | 0.170<br>(0.311)     | 0.0129<br>(0.501)   | -1.182***<br>(0.187)                                       | -1.368***<br>(0.280)  | 0.963***<br>(0.171)   | 1.199***<br>(0.257)  |
| Hostility                     |                      | 0.745*<br>(0.324)   |                                                            | 0.695***<br>(0.158)   |                       | -0.877***<br>(0.164) |
| Trust in National Governments |                      | -0.719<br>(0.514)   |                                                            | -0.141<br>(0.252)     |                       | 0.340<br>(0.233)     |
| Trust in EU                   |                      | 0.199<br>(0.546)    |                                                            | -0.0145<br>(0.274)    |                       | -0.0302<br>(0.257)   |
| EU Pride                      |                      | -0.305<br>(0.232)   |                                                            | -0.117<br>(0.110)     |                       | 0.232*<br>(0.109)    |
| LeftRight                     |                      | 0.0175<br>(0.115)   |                                                            | -0.00771<br>(0.0610)  |                       | -0.00720<br>(0.0612) |
| LiberalConservative           |                      | -0.0776<br>(0.108)  |                                                            | 0.0540<br>(0.0622)    |                       | -0.0145<br>(0.0620)  |
| Age                           |                      | -0.0117<br>(0.0101) |                                                            | -0.00216<br>(0.00691) |                       | 0.00496<br>(0.00637) |
| Female                        |                      | 0.772*<br>(0.330)   |                                                            | -0.0749<br>(0.187)    |                       | -0.184<br>(0.177)    |
| Education                     |                      | -0.0255<br>(0.0404) |                                                            | -0.0215<br>(0.0214)   |                       | 0.0256<br>(0.0201)   |
| Constant                      | -4.473***<br>(0.775) | -4.242**<br>(1.606) | -1.788***<br>(0.451)                                       | -2.700**<br>(0.853)   | 1.977***<br>(0.419)   | 2.744***<br>(0.833)  |
| N                             | 926                  | 889                 | 926                                                        | 889                   | 926                   | 889                  |

Robust standard errors in parentheses; + p&lt;.10, \* p&lt;.05, \*\* p&lt;.01, \*\*\* p&lt;.001

# Figure A1: Marginal Effects for Support for the EU Immigration Policies

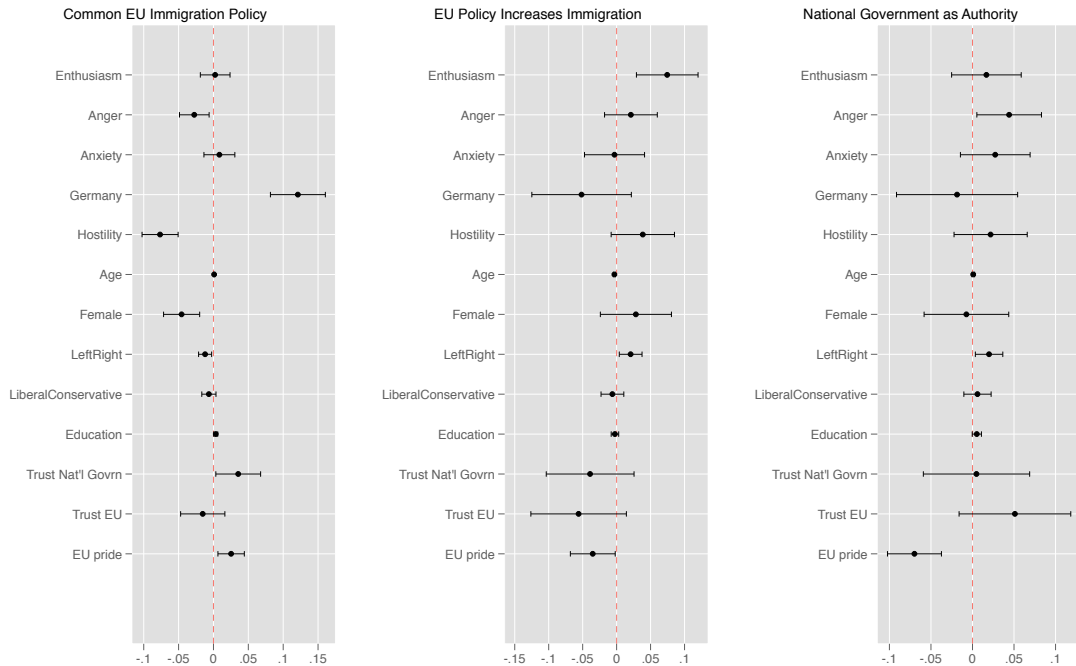

Figure A2: Marginal Effects for Common EU Counter-Terrorism Strategy

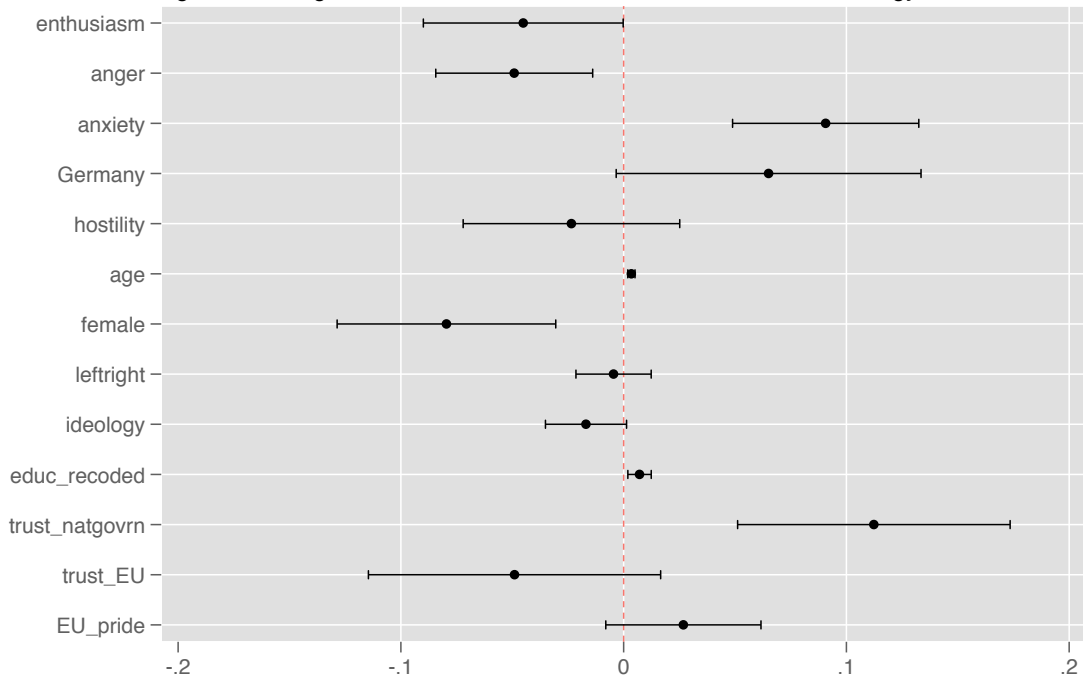

Figure A3: Marginal Effects on Preferring EU cooperation on terrorism, but not on immigration

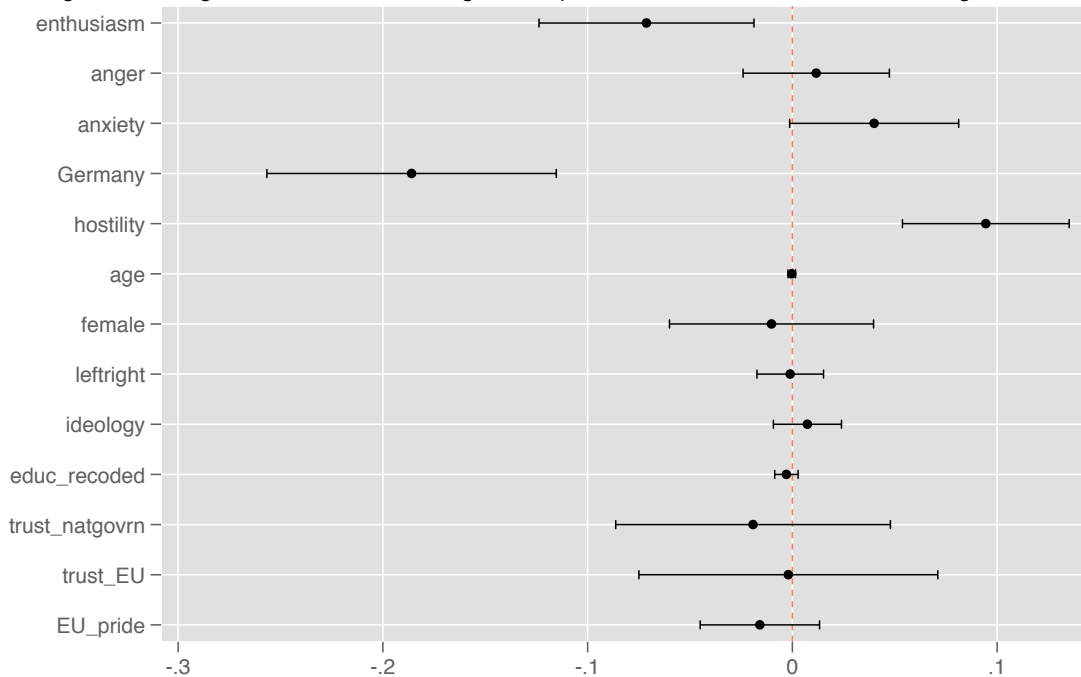

Supplement: Supplementary file 1 [file 1]
